# Supplementary material for: Reuse within the UK’s Charity Retail Sector: Steps towards Sustainability
Source: MDPI journal article supplement (doi:10.3390/su151612153), 2023-08-09
Supplement: s1 [file s1]

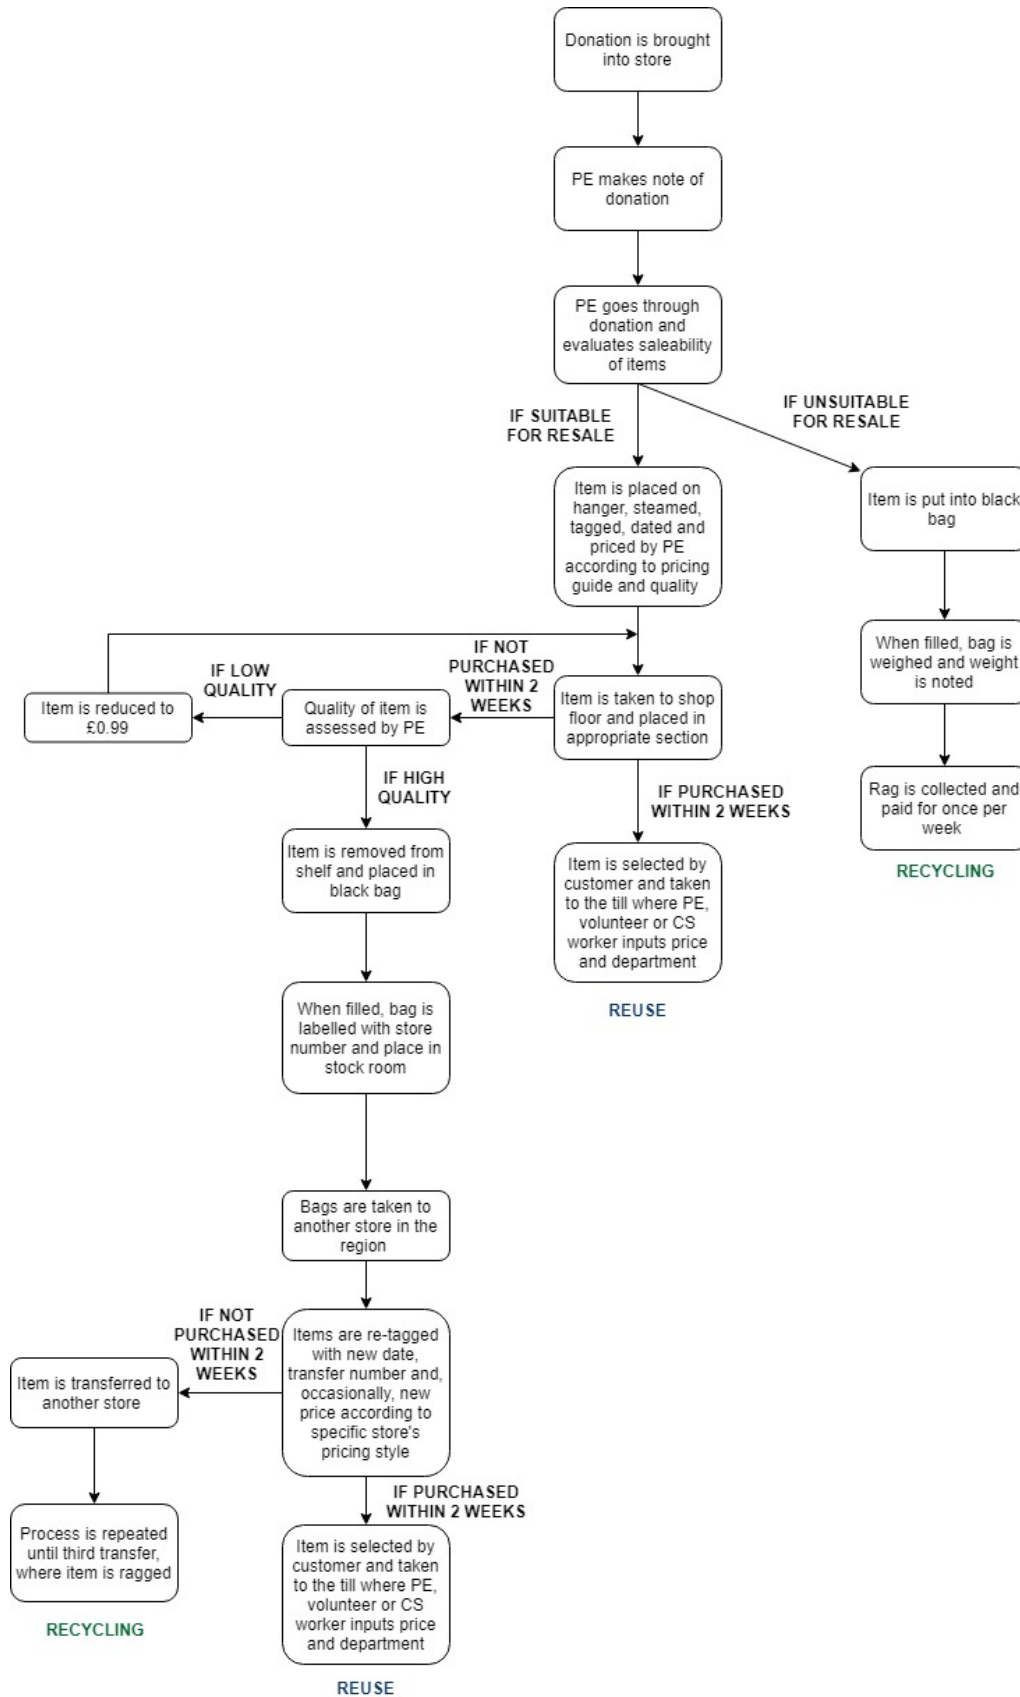

Figure S1: Schematic representation of the processes for receipt, assessment, preparation for sale, and subsequent fate of items donated to Store A.
